# Supplementary material
Source: publisher site journal article supplement (http://static.cambridge.org/content/id/urn:cambridge.org:id:article:S0376892919000225/resource/name/S0376892919000225supp001.docx)
Supplement: Supplementary file 1 [file S0376892919000225supp001.docx]

Title: Are we ready for elasmobranch conservation success?

Summary:

Numerous conservation and management actions have been implemented to help rebuild elasmobranch populations and growing evidence suggests some species are showing signs of recovery. While recovery is the intent of these actions, population increases can produce unforeseen challenges, particularly related to human social responses. We identify three forms of human–wildlife conflict related to the conservation of elasmobranchs and propose pathways critical for the development of solutions to these conflicts. Increased public  education and outreach regarding potential future implications of elasmobranch recovery and strategies to reduce conflict will be needed in order to avoid negative responses to successful conservation outcomes.
